# Supplementary material
Source: publisher figshare collection journal article supplement (https://frontiersin.figshare.com/ndownloader/files/15321836)

**Supplementary Figure 2.** Plots of the three first components of principal component analysis of protein occurrence and abundance during very early peach fruit development. PCA was conducted using Clustvis (Metsalu and Vilo, 2015). Proteomes of peach fruit mesocarp (m) and endocarp (e) were analyzed at E, S1 and S2 developmental stages. (A) Principal component 2 (PC2) versus principal component 1 (PC1) showing the 53.2 % of the variation. (B) Principal component 3 (PC3) versus PC1 explaining the 51.0 % of the variations. (C) PC3 vs PC2 accounting a 42.0 % of the protein variation.

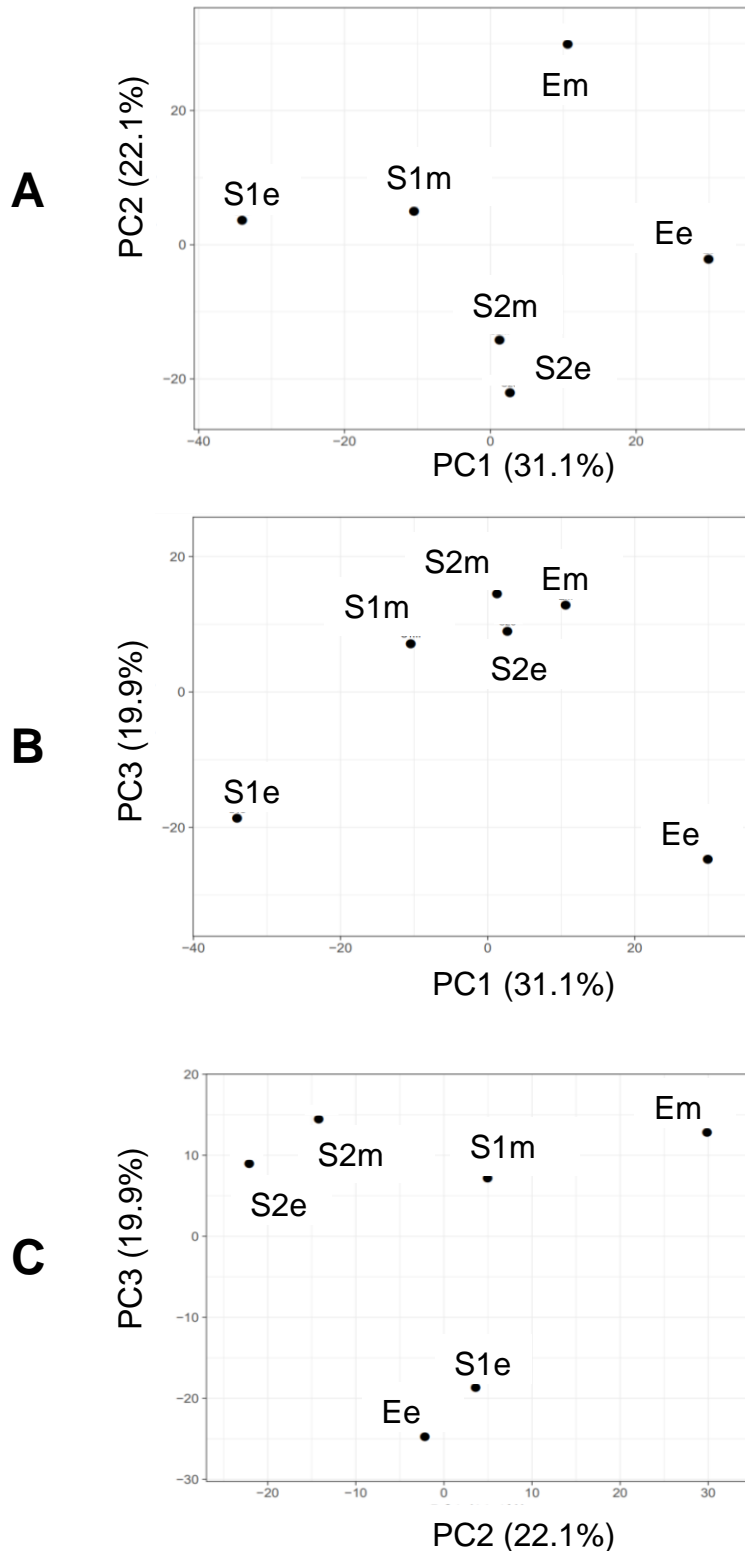

Supplement: Supplementary file [file 15321836]
